# Supplementary material for: Gelatin nanofibers fabricated by extruding immiscible polymer solution blend and their application in tissue engineering
Source: Royal Society of Chemistry journal article supplement (doi:10.1039/c1jm13059e), 2011-01-01
Supplement: c1jm13059e.pdf [file c1jm13059e.pdf]

# **Gelatin Nanofibers Fabricated by Extruding Immiscible Polymer Solution**

## **Blend and Their Application in Tissue-engineering**

*Ang Lu<sup>1</sup>, Jing Zhu<sup>1</sup>, Guodong Zhang<sup>2</sup>, Jun Yang<sup>2</sup>, Gang Sun<sup>1,\*</sup>*

<sup>1</sup> Fiber and Polymer Science, University of California, Davis, CA 95616

<sup>2</sup> Department of Entomology, University of California, Davis, CA 95616

---

\*Correspondence to: Gang Sun  
(E-mail: gysun@ucdavis.edu Tel: +1 530 752 0840, Fax: +1 530 752 7584)

### Electronic Supplementary Information

As shown in ESI Figure 1, the gelatin solution behaved as spherical droplets in the mixture of gelatin aqueous solution and CAB solution in ethyl acetate. And with an increase of mixing temperature, the dimensions of gelatin solution droplets decreased, since the two solutions have the closest viscosities at 45°C.

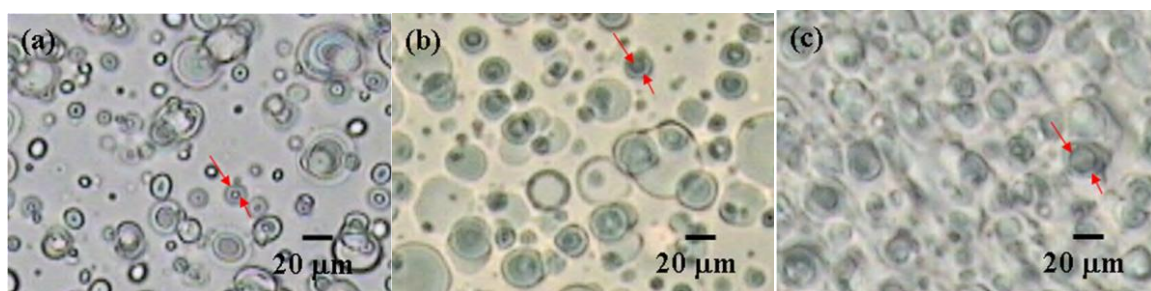

**ESI Fig. 1.** Optical microscope images of the gelatin solution droplets in CAB/gelatin solution blends mixed at different temperatures (CAB solution/gelatin solution=85/15): a, 45°C; b, 40°C and c, 35°C.
